# Supplementary material for: A highly dispersed and anti-coking Ni–La2O3/SiO2 catalyst for syngas production from dry carbon dioxide reforming of methane
Source: Royal Society of Chemistry journal article supplement (doi:10.1039/c3cy00869j), 2014-01-01
Supplement: c3cy00869j1.pdf [file c3cy00869j1.pdf]

## Electronic Supplementary Information

### **Highly Dispersed and Anti-Coking Ni-La<sub>2</sub>O<sub>3</sub>/SiO<sub>2</sub> Catalyst for Syngas Production from Dry Carbon Dioxide Reforming of Methane**

Liuye Mo, Kerina Kai Mun Leong and Sibudjing Kawi\*

Department of Chemical and Biomolecular Engineering, National University of Singapore,

Singapore 117576

Corresponding author:

Tel: (65) 6516 6312

Fax: (65) 6779 1936

E-mail: [chekawis@nus.edu.sg](mailto:chekawis@nus.edu.sg)

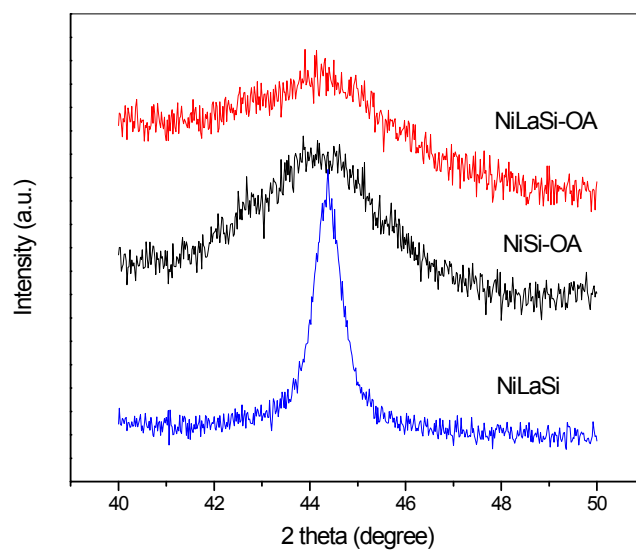

Figure 1S. XRD patterns of reduced catalysts.

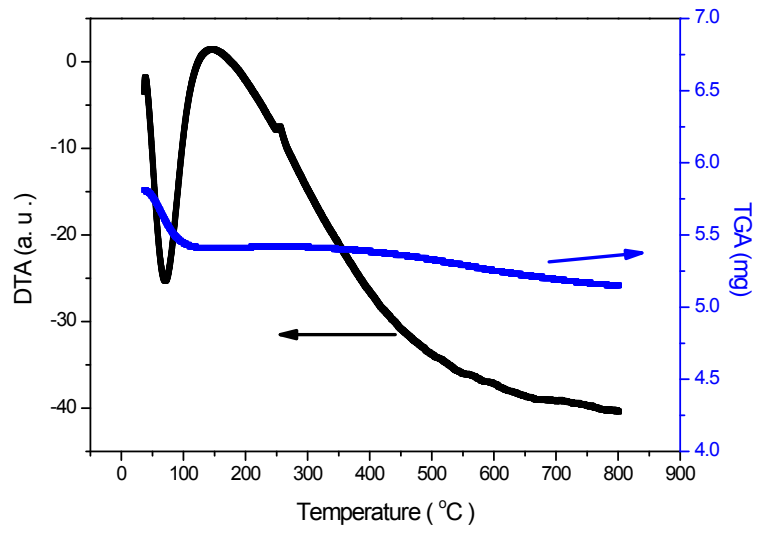

Figure 2S. DTA-TGA of SiO<sub>2</sub>.
